# Supplementary material for: Amorphous Ta2O5-supported Ru as an efficient electrocatalyst for selective hydrogenation of cinnamaldehyde with water as the hydrogen source
Source: Royal Society of Chemistry journal article supplement (doi:10.1039/d1qi00712b), 2021-01-01
Supplement: d1qi00712b1.pdf [file d1qi00712b1.pdf]

## Supplementary Information

Amorphous Ta<sub>2</sub>O<sub>5</sub>-supported Ru as an efficient electrocatalyst for selective hydrogenation of cinnamaldehyde with water as the hydrogen source

Tianxing Wu,\* Hanqi Meng and Rui Dang

Northwest Institute for Non-ferrous Metal Research, Xi'an, 710016, P. R. China

\*E-mail: mybestteacher@163.com (Tianxing Wu)

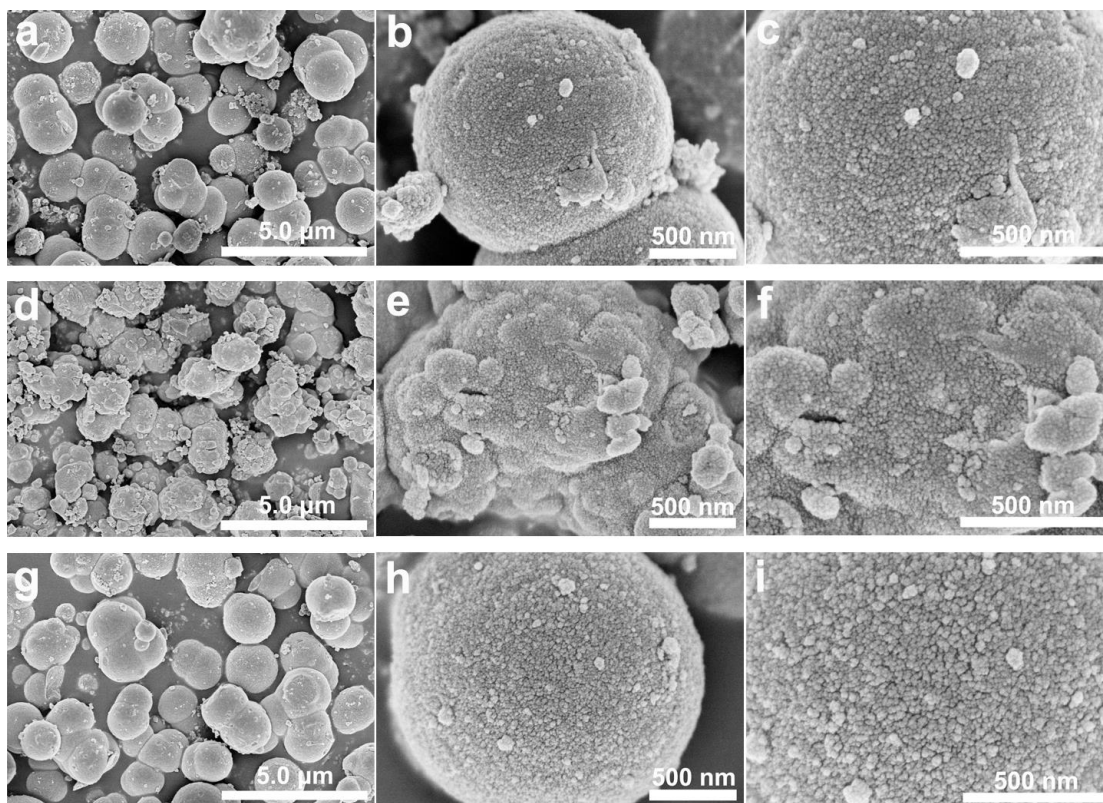

**Fig. S1** SEM images of samples under different magnification: (a-c) Ta<sub>2</sub>O<sub>5</sub>; (d-f) Ta<sub>2</sub>O<sub>5</sub>/Ru-4.0; (g-i) Ta<sub>2</sub>O<sub>5</sub>-400.

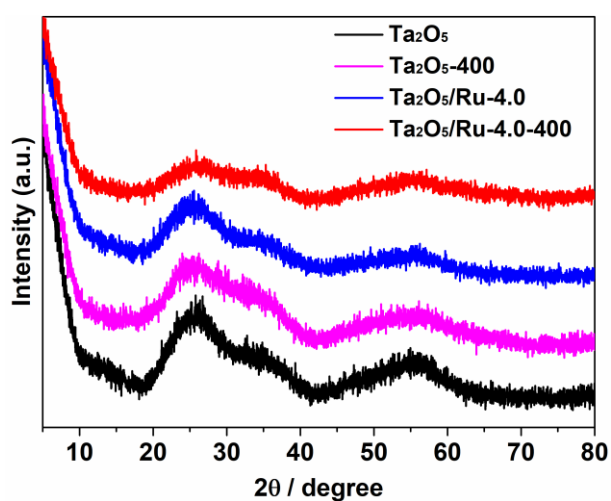

**Fig. S2** XRD patterns of Ta<sub>2</sub>O<sub>5</sub>, Ta<sub>2</sub>O<sub>5</sub>-400, Ta<sub>2</sub>O<sub>5</sub>/Ru-4.0 and Ta<sub>2</sub>O<sub>5</sub>/Ru-4.0-400.

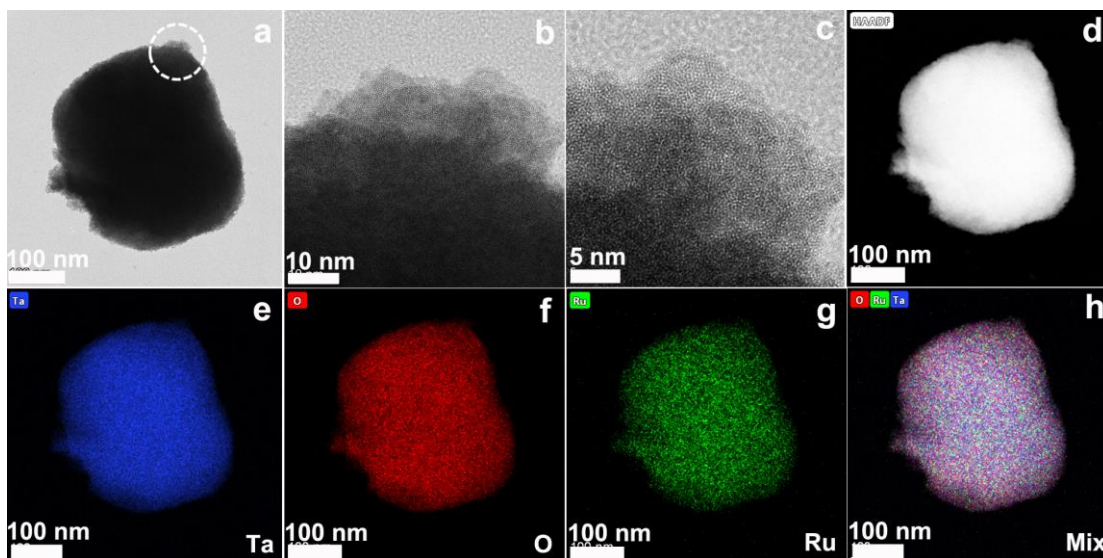

**Fig. S3** Ta<sub>2</sub>O<sub>5</sub>/Ru-4.0: (a) TEM image; (b)(c) HRTEM images; (d-h) High-angle annular dark-field scanning transmission electron microscopy (HAADF-STEM) and corresponding elemental mapping images.

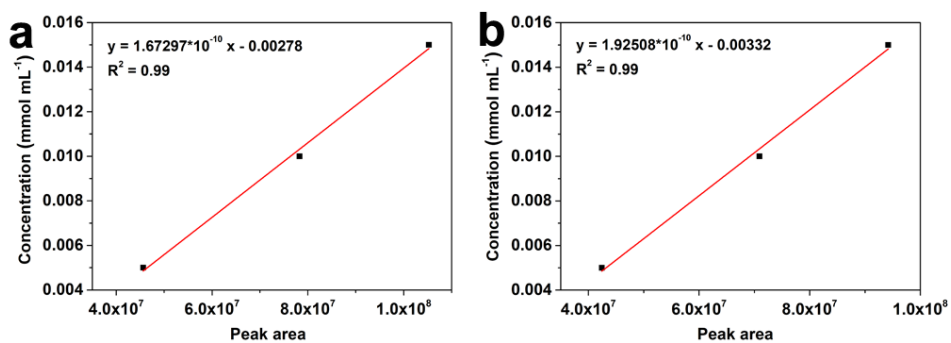

**Fig. S4** Gas chromatograph spectrogram and the corresponding calibration curves of (a) CAL and (b) HCAL.

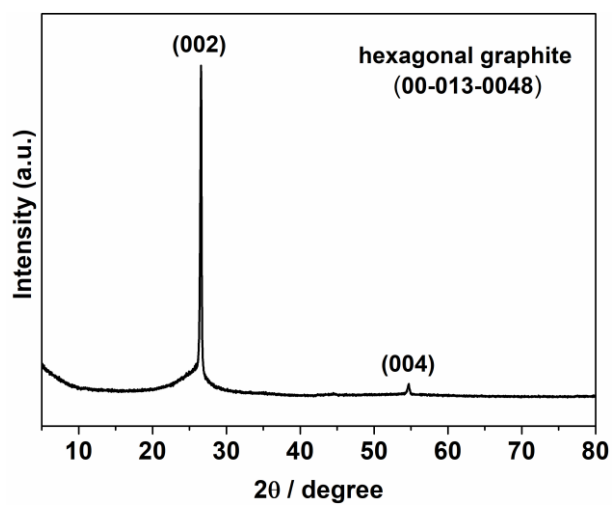

**Fig. S5** XRD pattern of Ta<sub>2</sub>O<sub>5</sub>/Ru-4.0-400 after ECH measurement in 0.1 M PBS electrolyte.

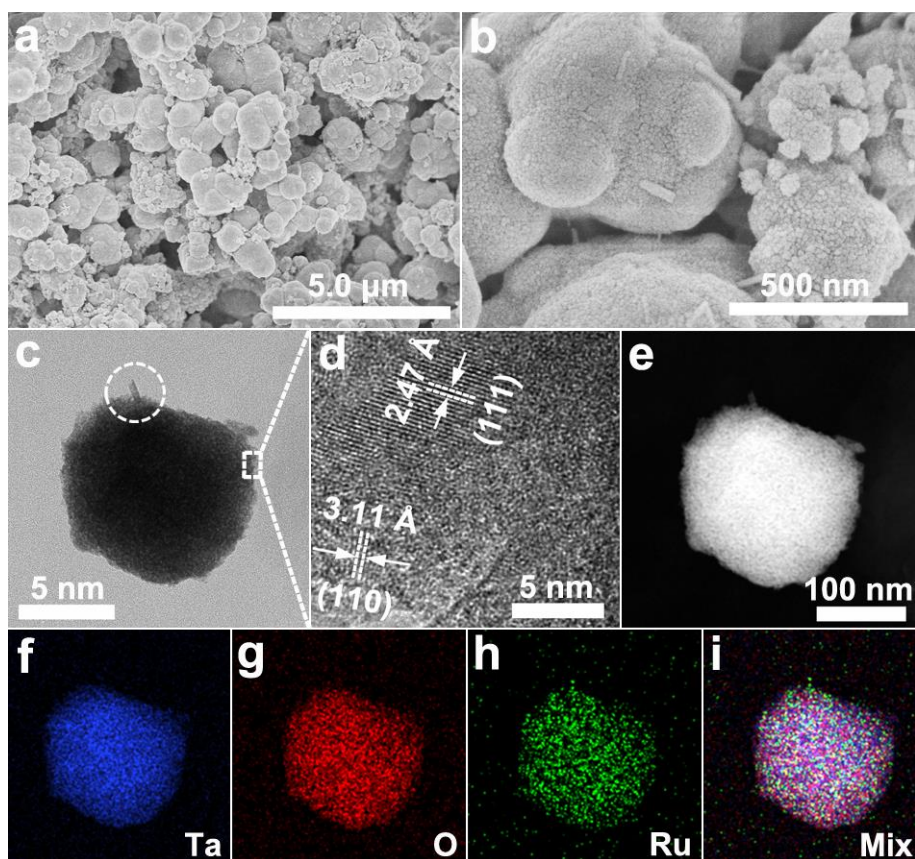

**Fig. S6** Ta<sub>2</sub>O<sub>5</sub>/Ru-4.0-400 after ECH measurement in 0.1 M PBS electrolyte: (a) Low-magnification SEM image; (b) High-magnification SEM image; (c) TEM image; (d) HRTEM image; (e) High-angle annular dark-field scanning transmission electron microscopy (HAADF-STEM) and (f-i) corresponding elemental mapping images.

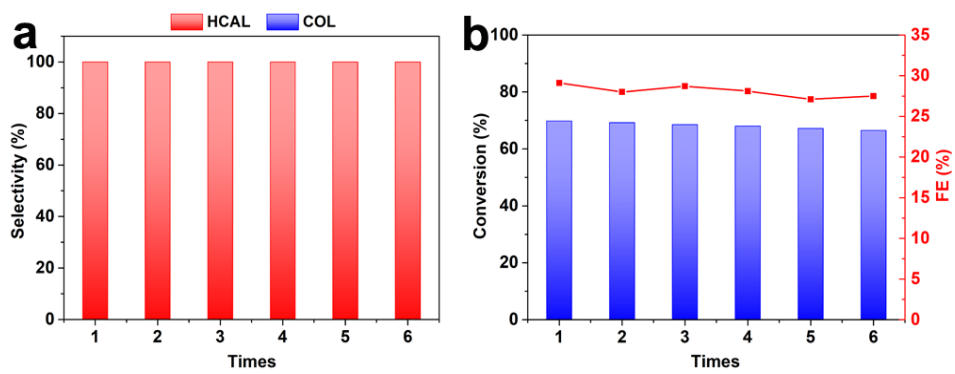

**Fig. S7** The six consecutive cycling tests of Ta<sub>2</sub>O<sub>5</sub>/Ru-4.0-400.

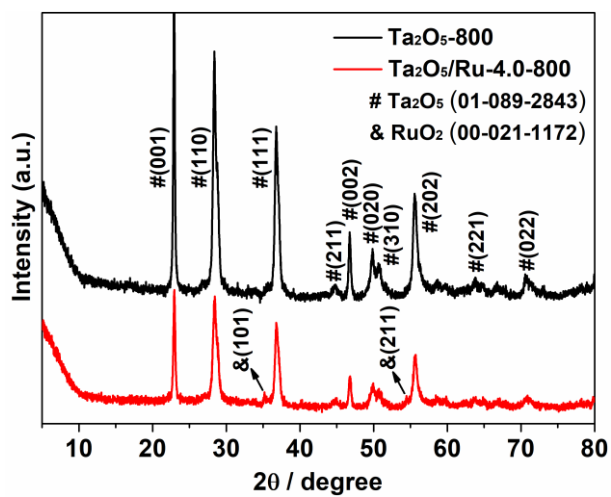

**Fig. S8** XRD patterns of Ta<sub>2</sub>O<sub>5</sub>-800 and Ta<sub>2</sub>O<sub>5</sub>/Ru-4.0-800.

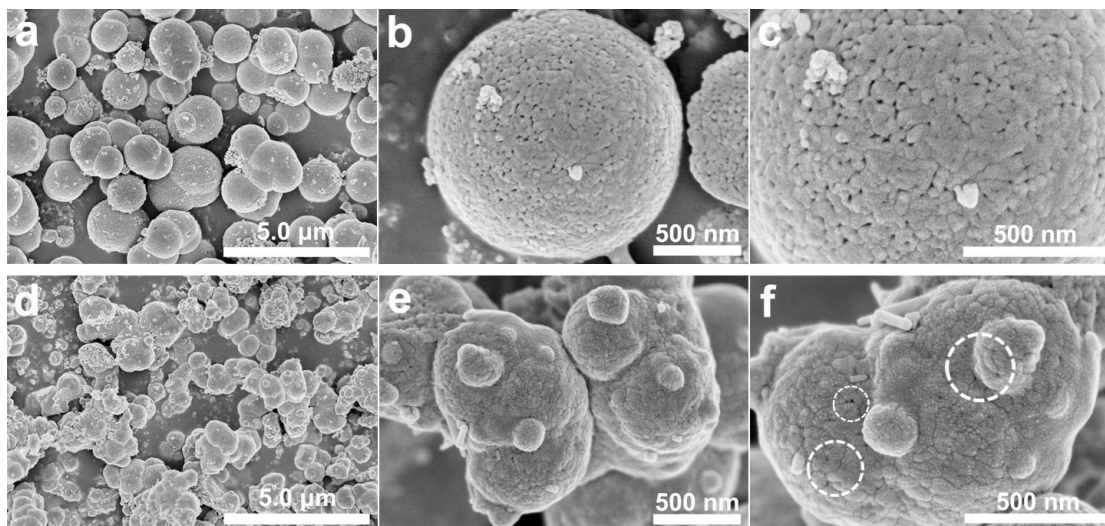

**Fig. S9** SEM images of samples under different magnification: (a-c) Ta<sub>2</sub>O<sub>5</sub>-800; (d-f) Ta<sub>2</sub>O<sub>5</sub>/Ru-4.0-800.

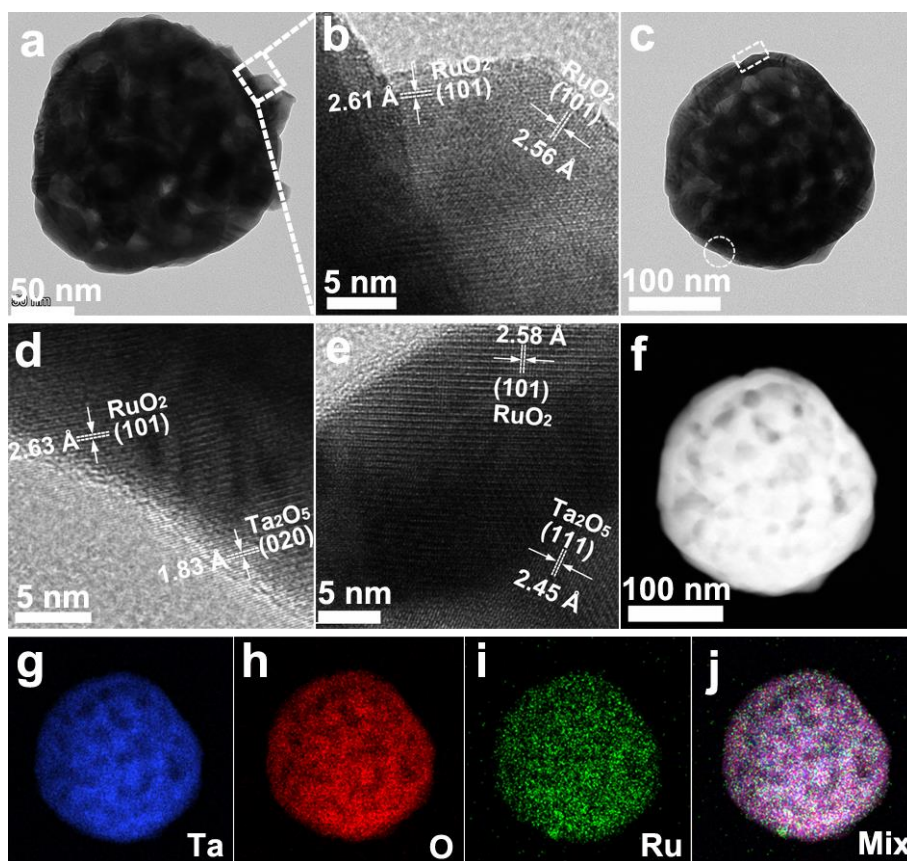

**Fig. S10**  $\text{Ta}_2\text{O}_5/\text{Ru}$ -4.0-800: (a) TEM image; (b) HRTEM image; (c) TEM image; (d)(e) HRTEM images; (f) High-angle annular dark-field scanning transmission electron microscopy (HAADF-STEM) and (g-j) corresponding elemental mapping images.



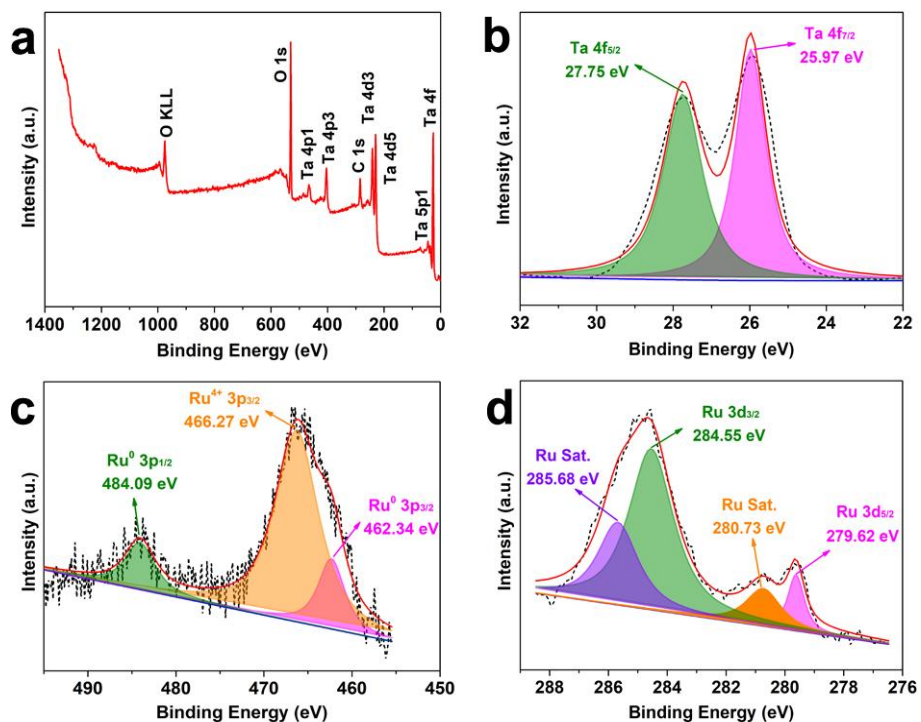

**Fig. S11** (a) Surface survey XPS spectra of Ta<sub>2</sub>O<sub>5</sub>/Ru-4.0-800; High-resolution XPS spectrum of (b) Ta 4f, (c) Ru 3p and (d) Ru 3d.

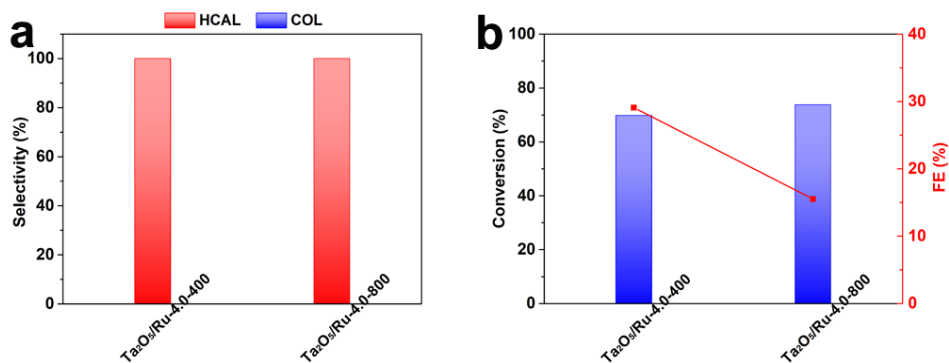

**Fig. S12** Effect of the annealing treatment temperature of Ta<sub>2</sub>O<sub>5</sub>/Ru-4.0 on electrocatalytic CAL hydrogenation under -1.1 V vs. RHE: (a) selectivity, (b) conversion and FE.

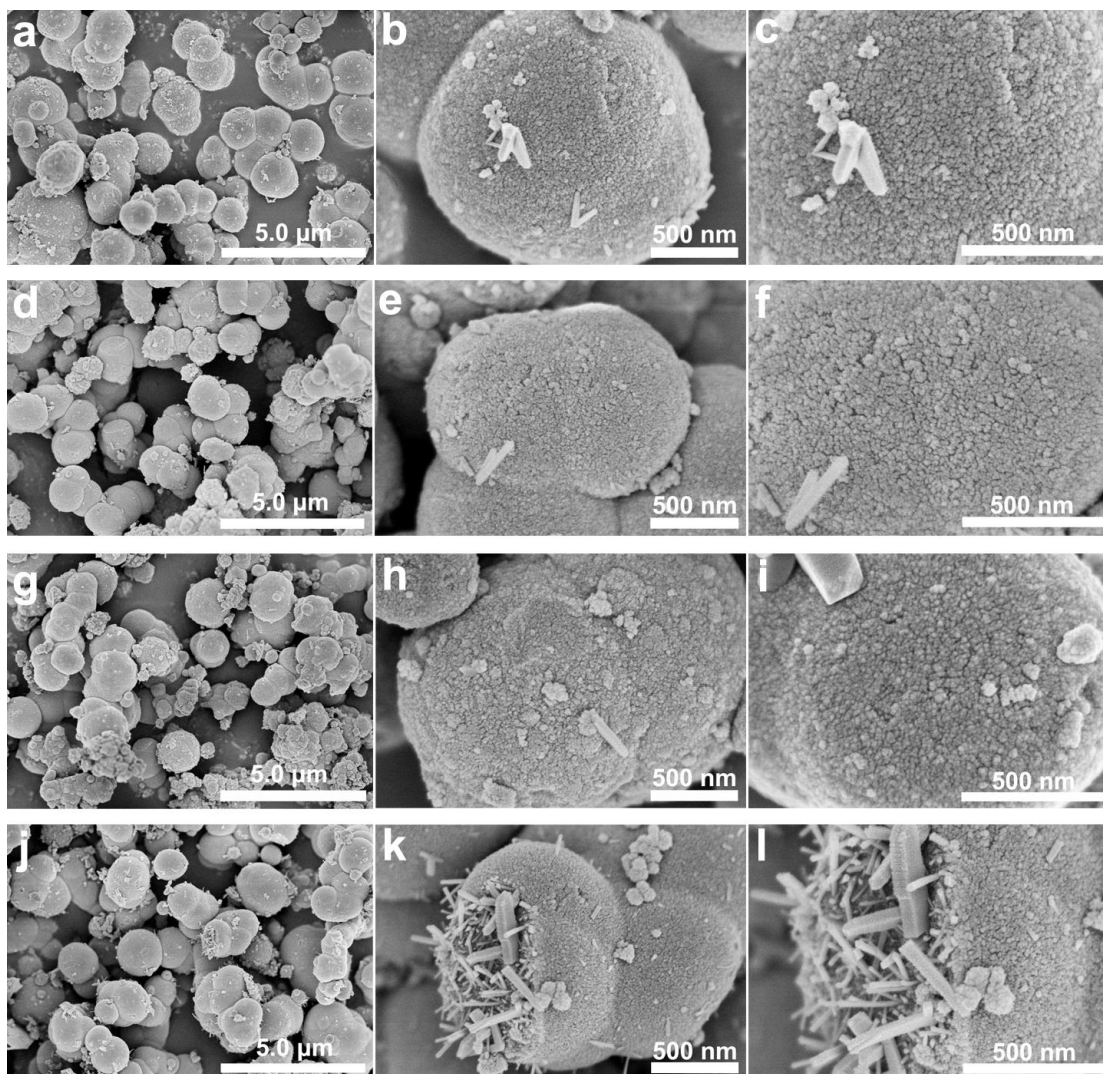

**Fig. S13** SEM images of samples under different magnification: (a-c)  $\text{Ta}_2\text{O}_5/\text{Ru}-1.0-400$ ; (d-f)  $\text{Ta}_2\text{O}_5/\text{Ru}-2.0-400$ ; (g-i)  $\text{Ta}_2\text{O}_5/\text{Ru}-3.0-400$ ; (j-l)  $\text{Ta}_2\text{O}_5/\text{Ru}-5.0-400$ .

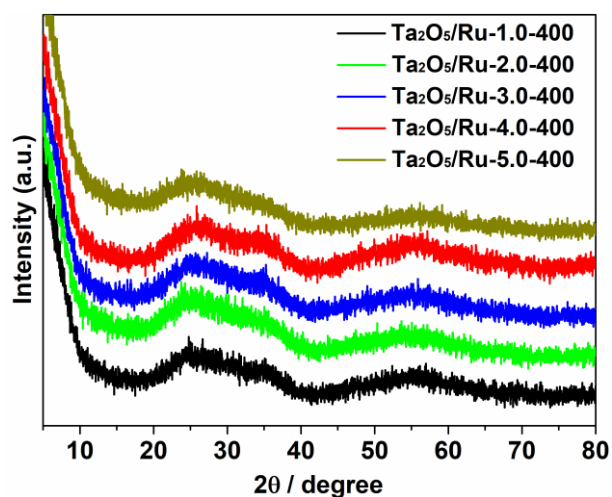

**Fig. S14** XRD patterns of Ta<sub>2</sub>O<sub>5</sub>/Ru-1.0-400, Ta<sub>2</sub>O<sub>5</sub>/Ru-2.0-400, Ta<sub>2</sub>O<sub>5</sub>/Ru-3.0-400, Ta<sub>2</sub>O<sub>5</sub>/Ru-4.0-400, and Ta<sub>2</sub>O<sub>5</sub>/Ru-5.0-400.

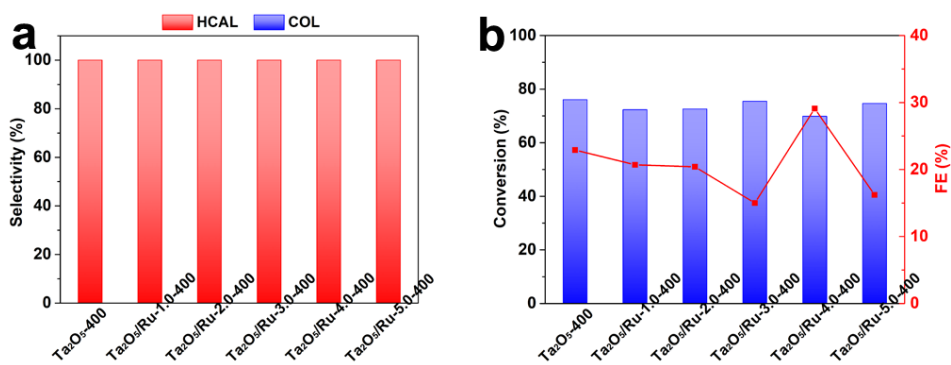

**Fig. S15** Effect of the content of Ru on electrocatalytic CAL hydrogenation under -1.1 V vs. RHE: (a) selectivity, (b) conversion and FE.
